# Supplementary material
Source: publisher figshare collection journal article supplement (https://frontiersin.figshare.com/ndownloader/files/14991545)
Supplement: Supplementary file 1 [file 14991545]

**Supplementary Material**

# Supplementary Figures and Tables

## Supplementary Figures

**Supplemental Figure 1.** 18S gene copy number estimation pipeline.

**Supplemental Figure 2.** Coverage distribution of reference single copy genes in 12 *Ostreococcus tauri* genome sequencing runs.

**Supplemental Figure 3.** Correlations between sequencing depth and GC% for 12 *Ostreococcus tauri* strains. GC% of V4 and median of GC% of single copy gene (SCG) are labeled.

**Supplemental Figure 4.** Violin plot shows 18S gene copy number estimates for *E. huxleyi* strains isolated from Bergen Sea and English Channel. Width of violin plot represents number of strains with corresponding 18S gene copy number estimates. Error bars represent standard deviations (n = 4 and 3, respectively).

## Supplementary Tables

**Supplemental Table 1.** 18S gene copy number estimates and metadata for genomes obtained from NCBI SRA database.

**Supplemental Table 2.** Accession numbers of reference single copy genes in BUSCO Protist dataset.
